# Supplementary material
Source: bioRxiv or medRxiv preprint supplement (https://www.biorxiv.org/highwire/filestream/35469/field_highwire_adjunct_files/8/077701-4.pdf)

## Genome Instability and Mutation

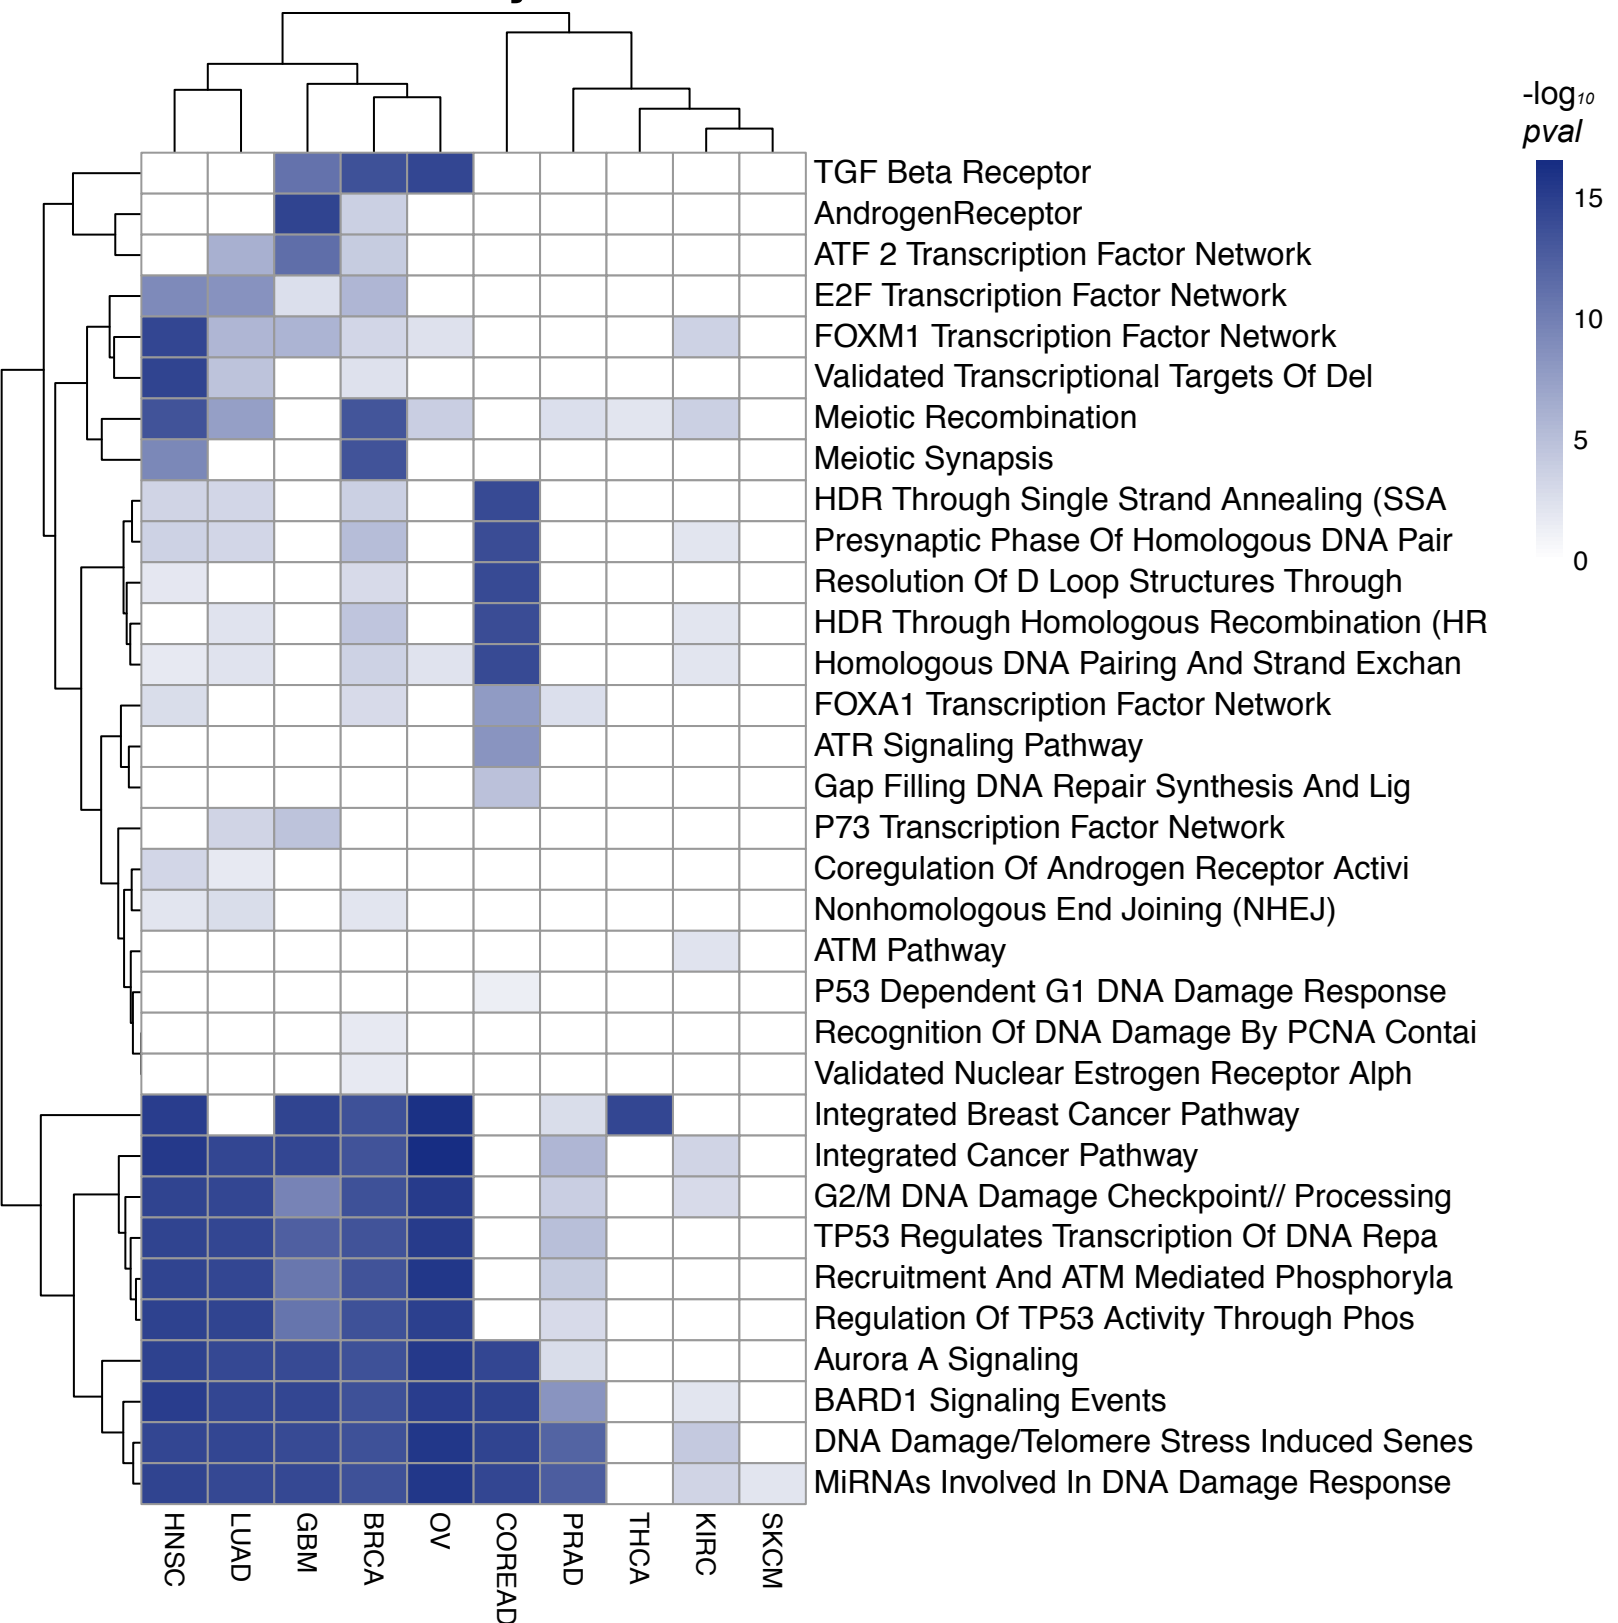

## Resisting Cell Death

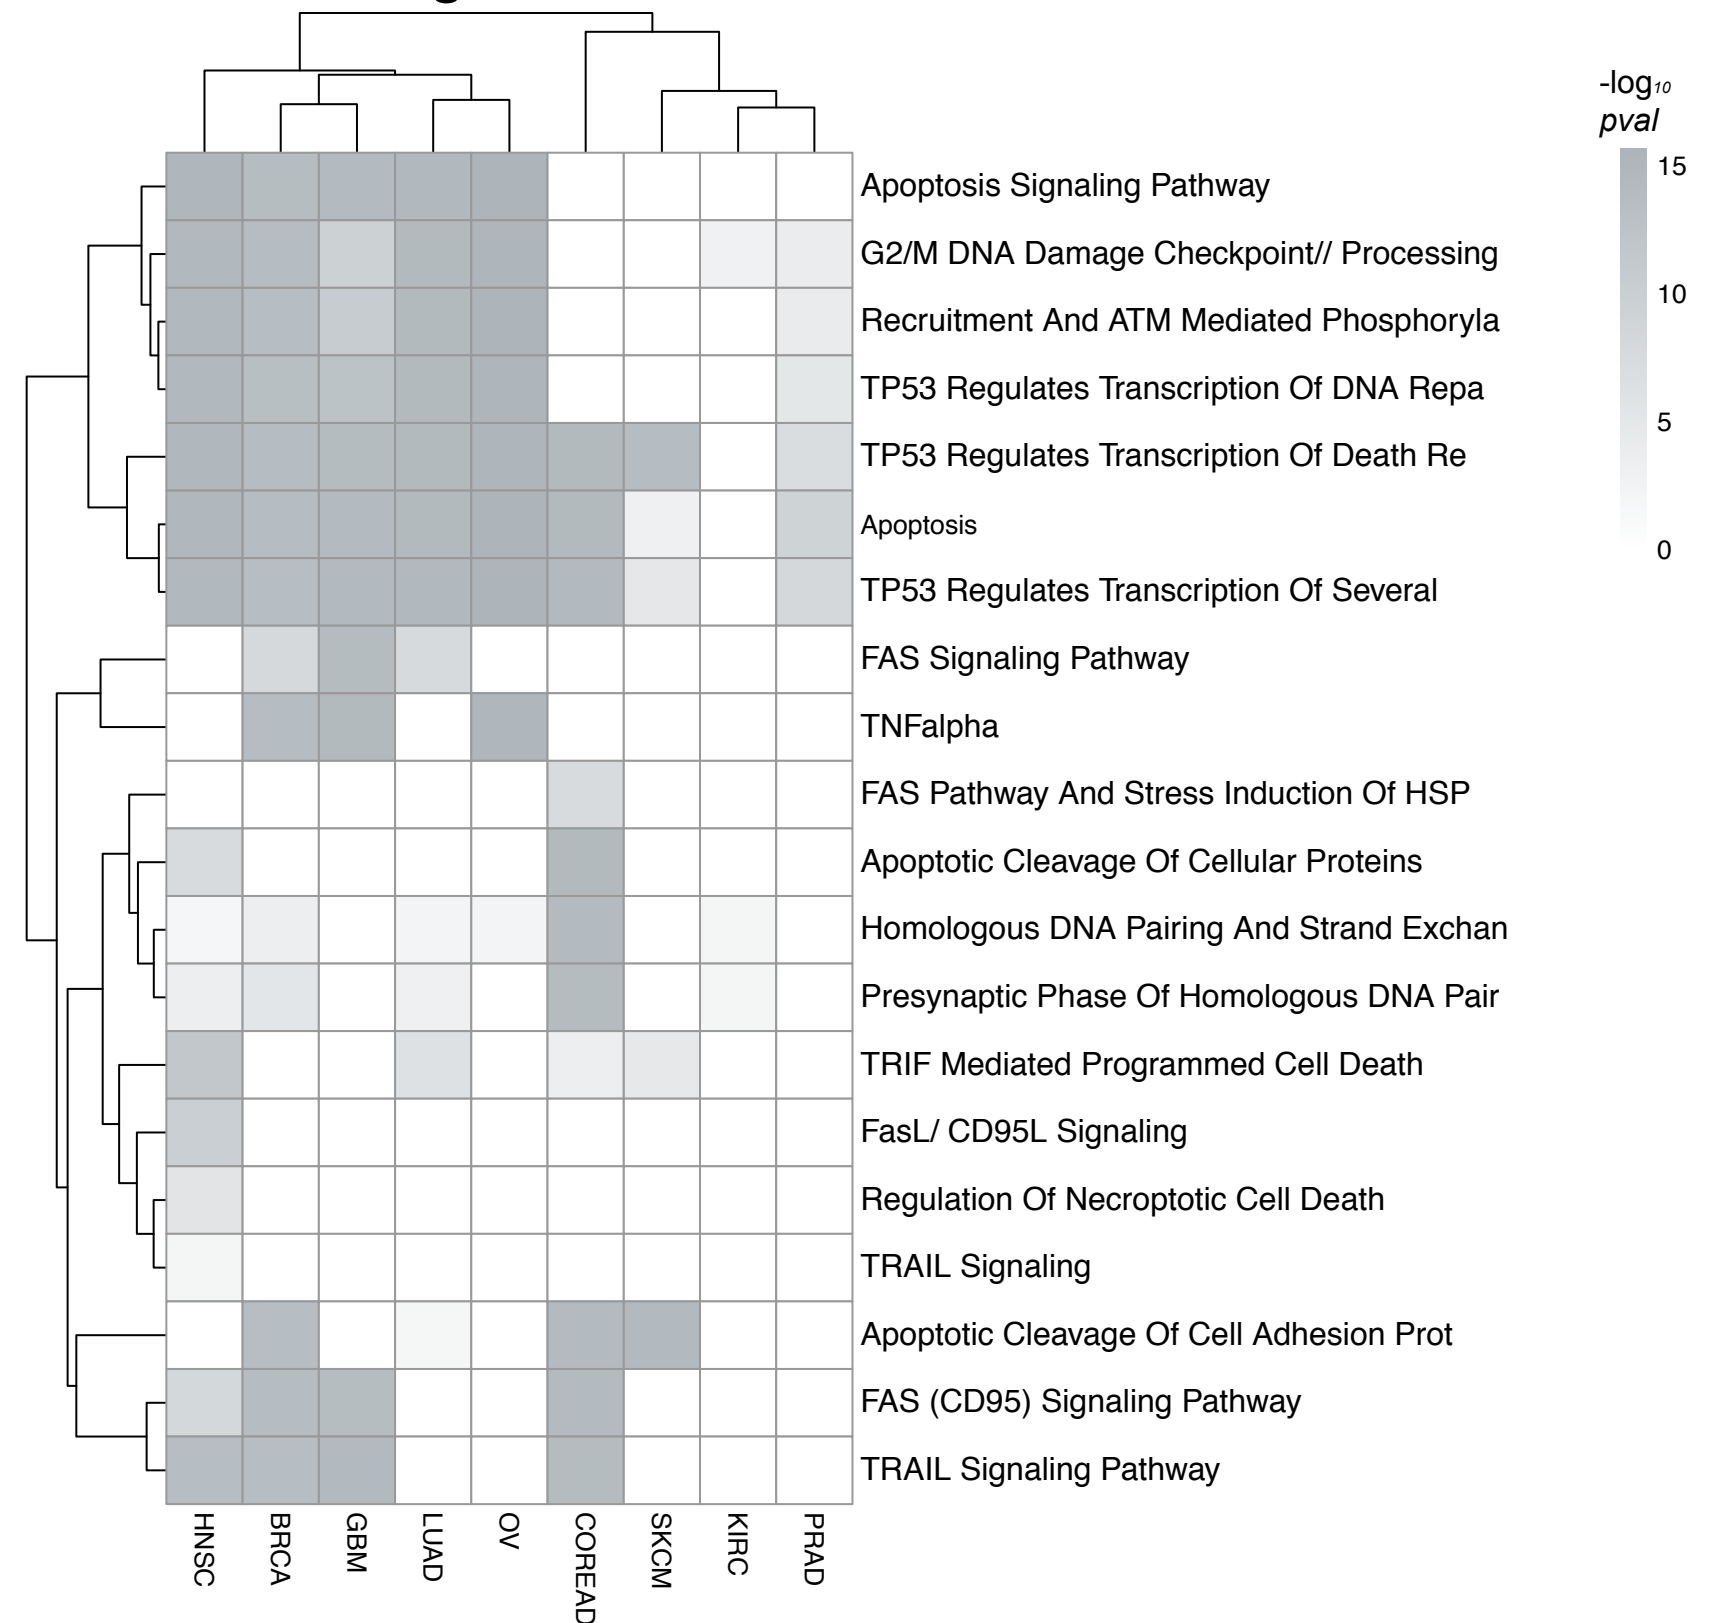

## Deregulating Cellular Energetics

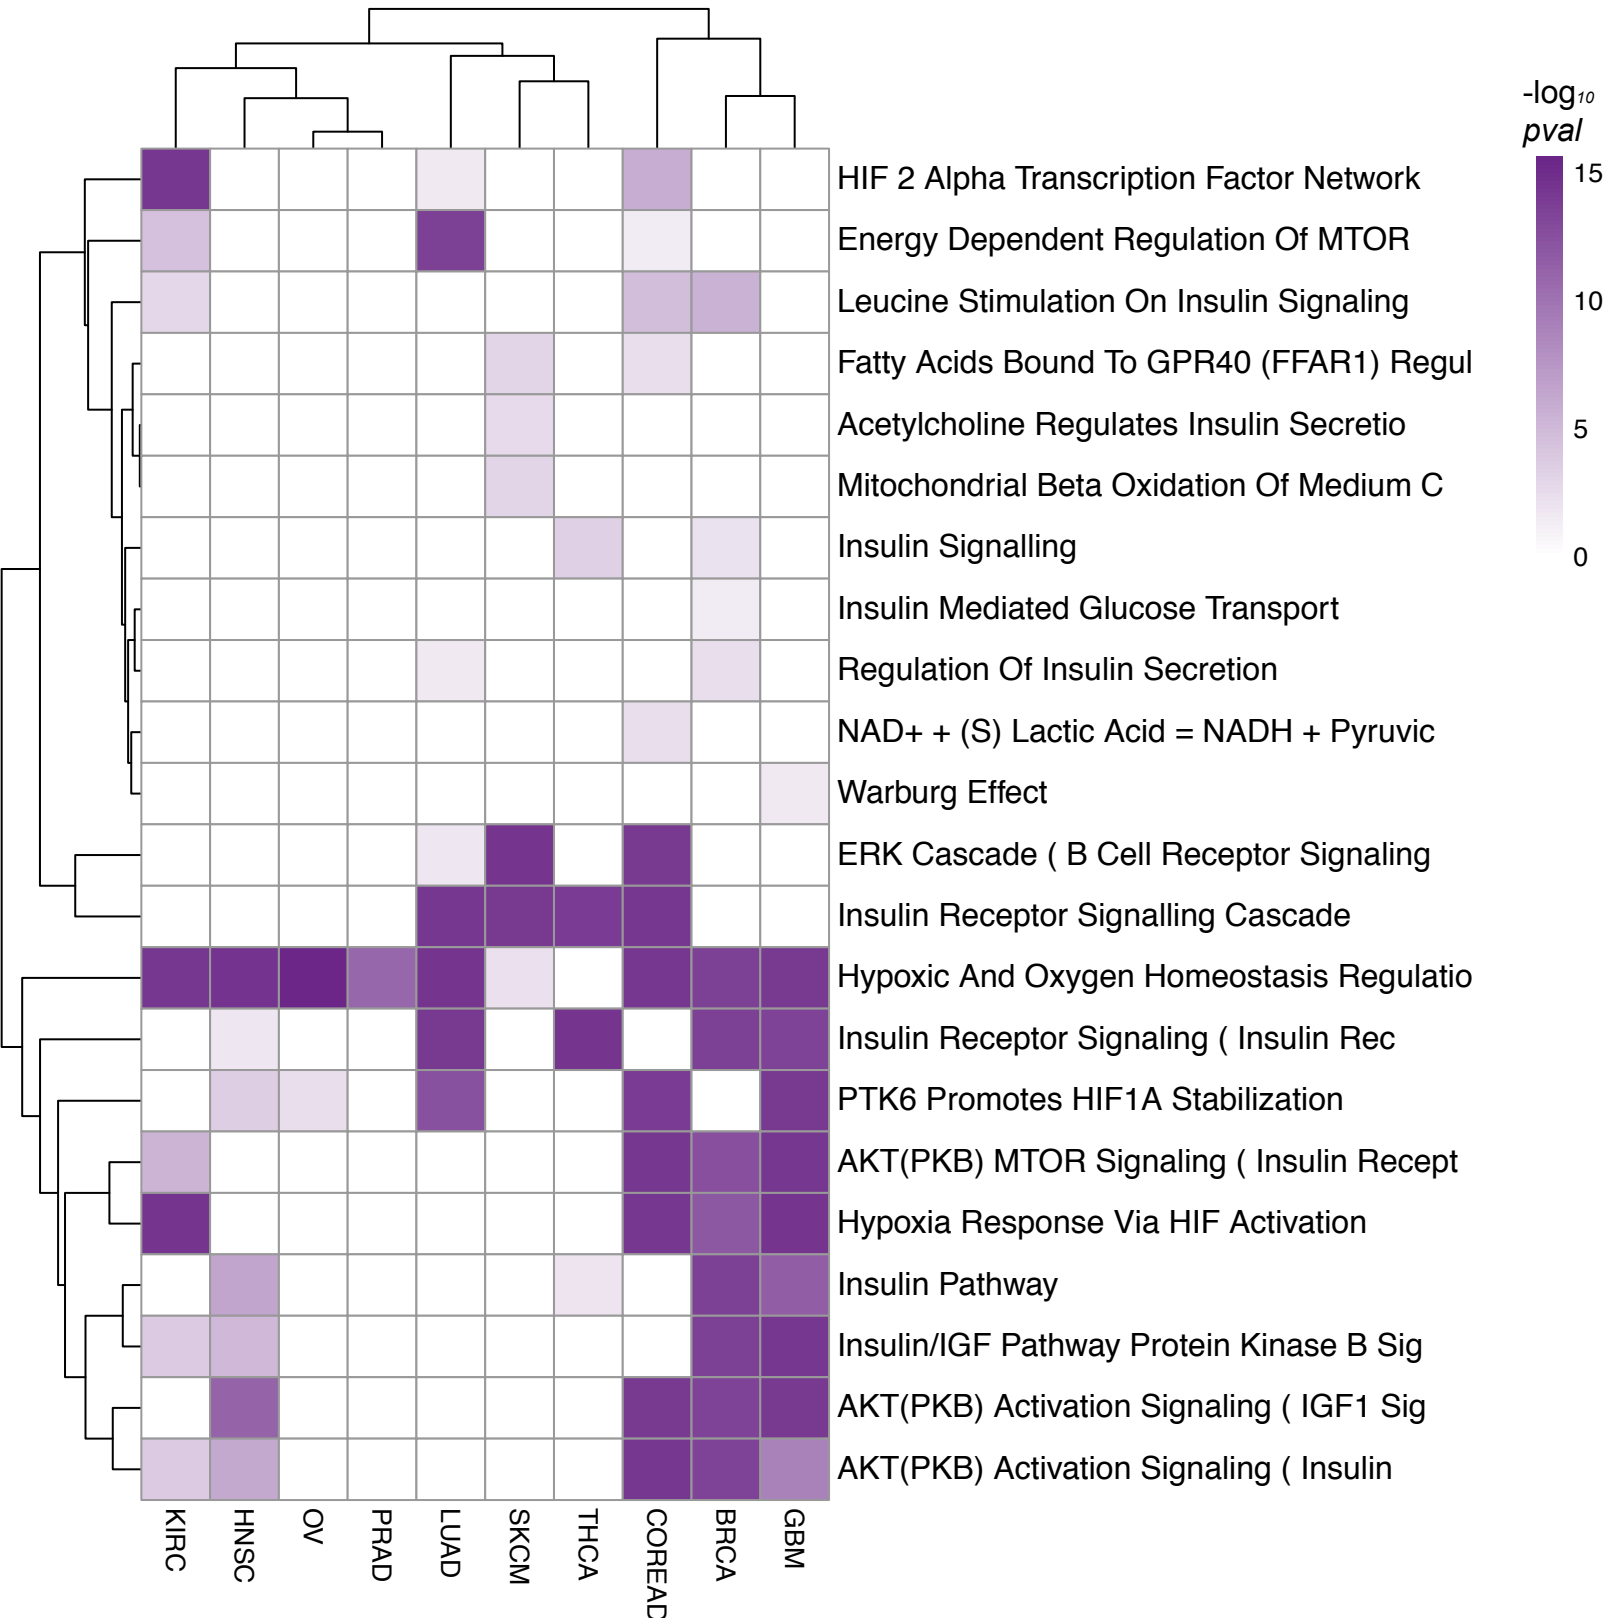

## Tumour-Promoting Inflammation

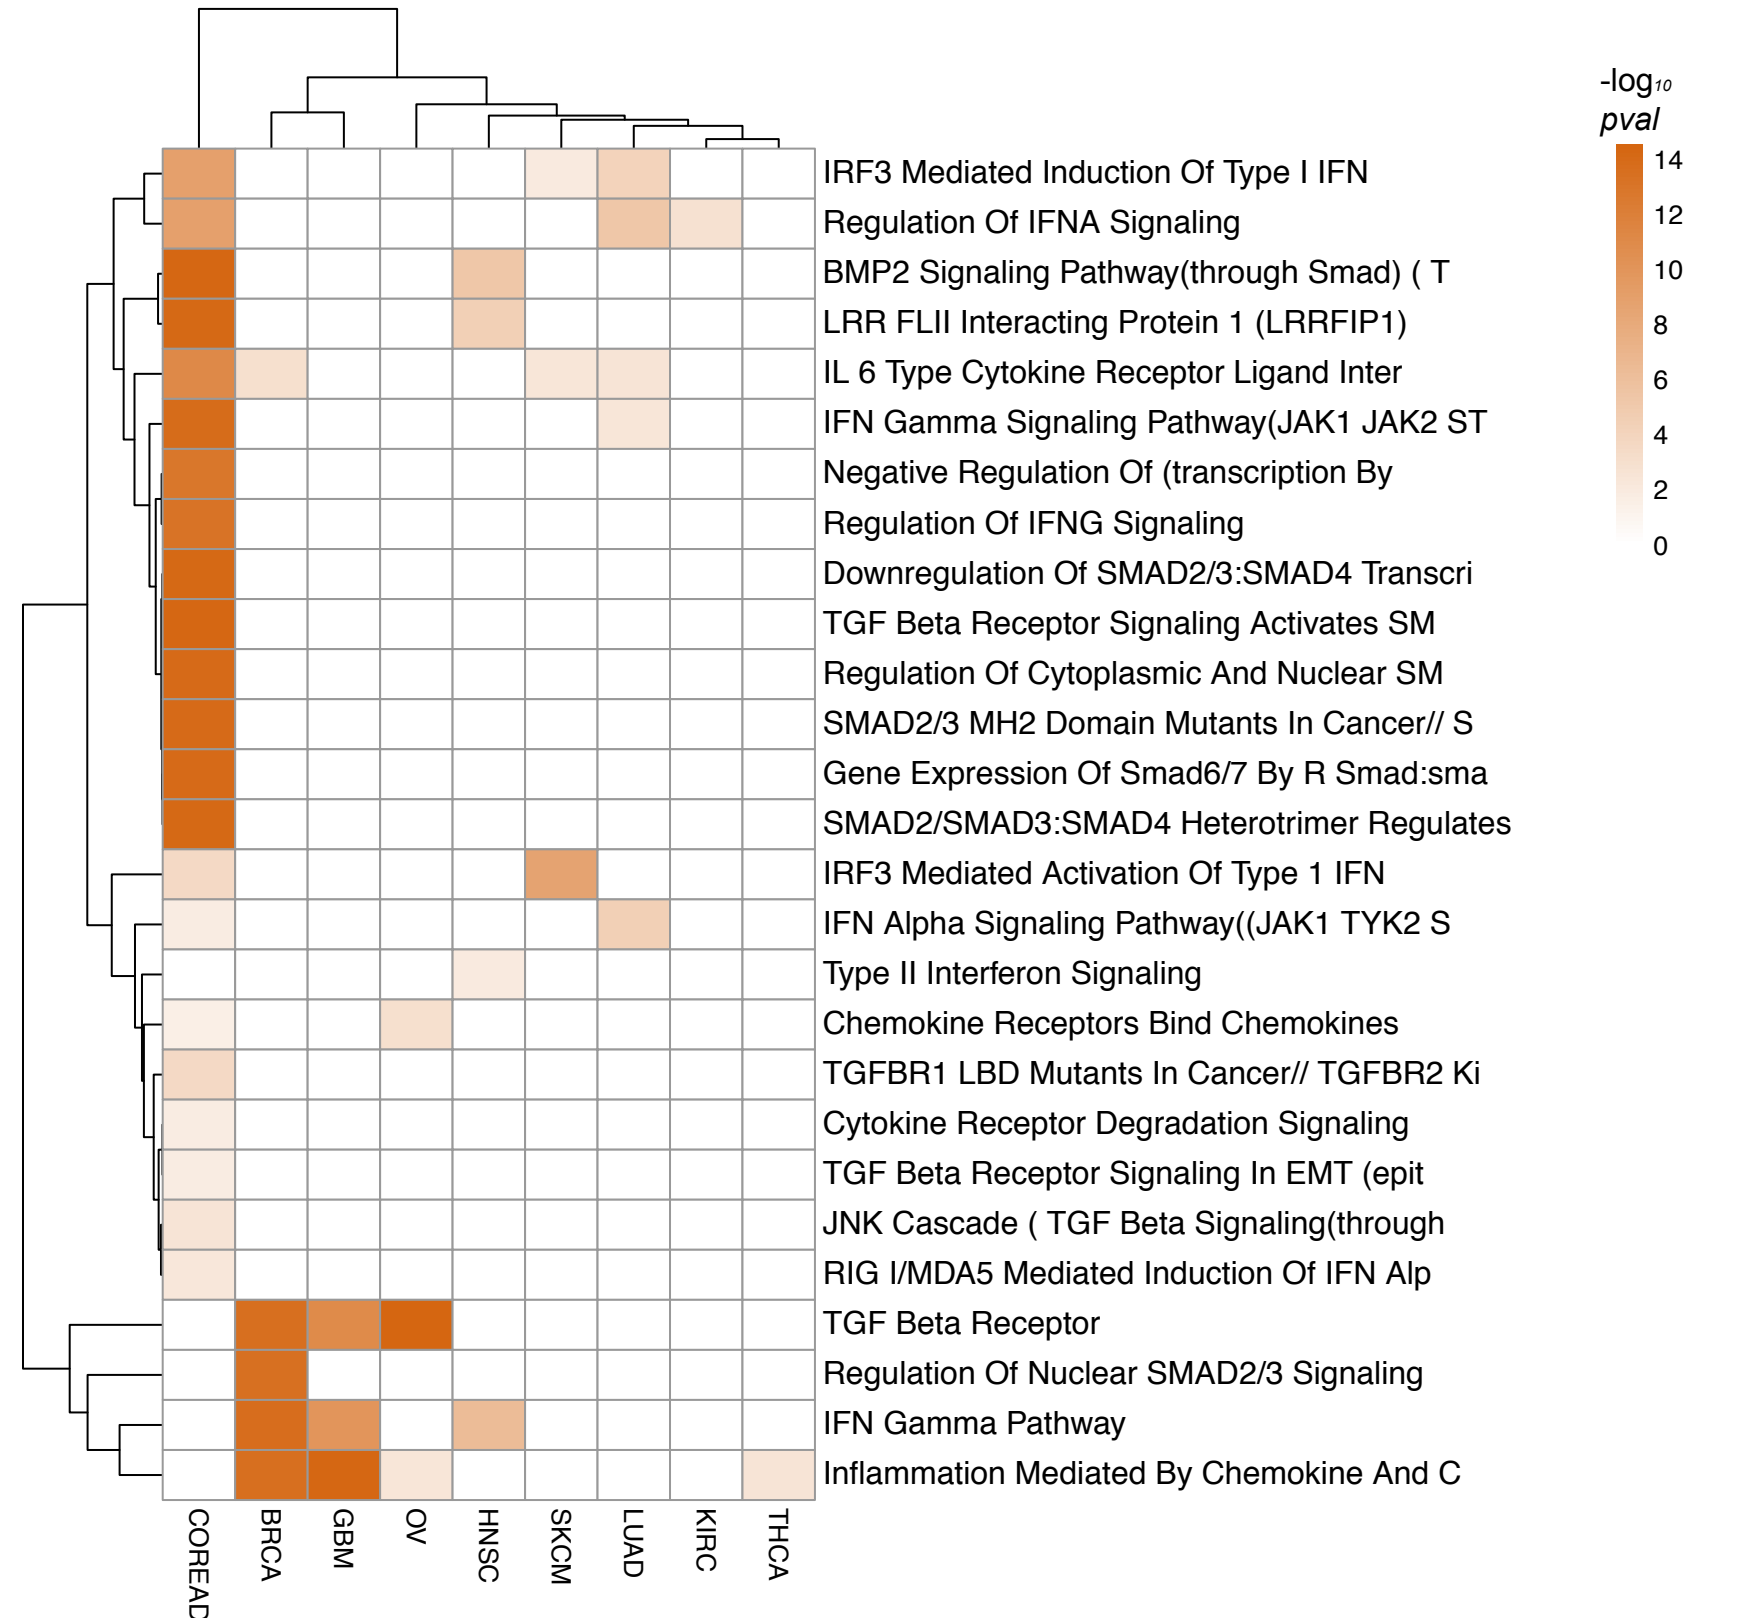

## Activating Invasion and Metastasis

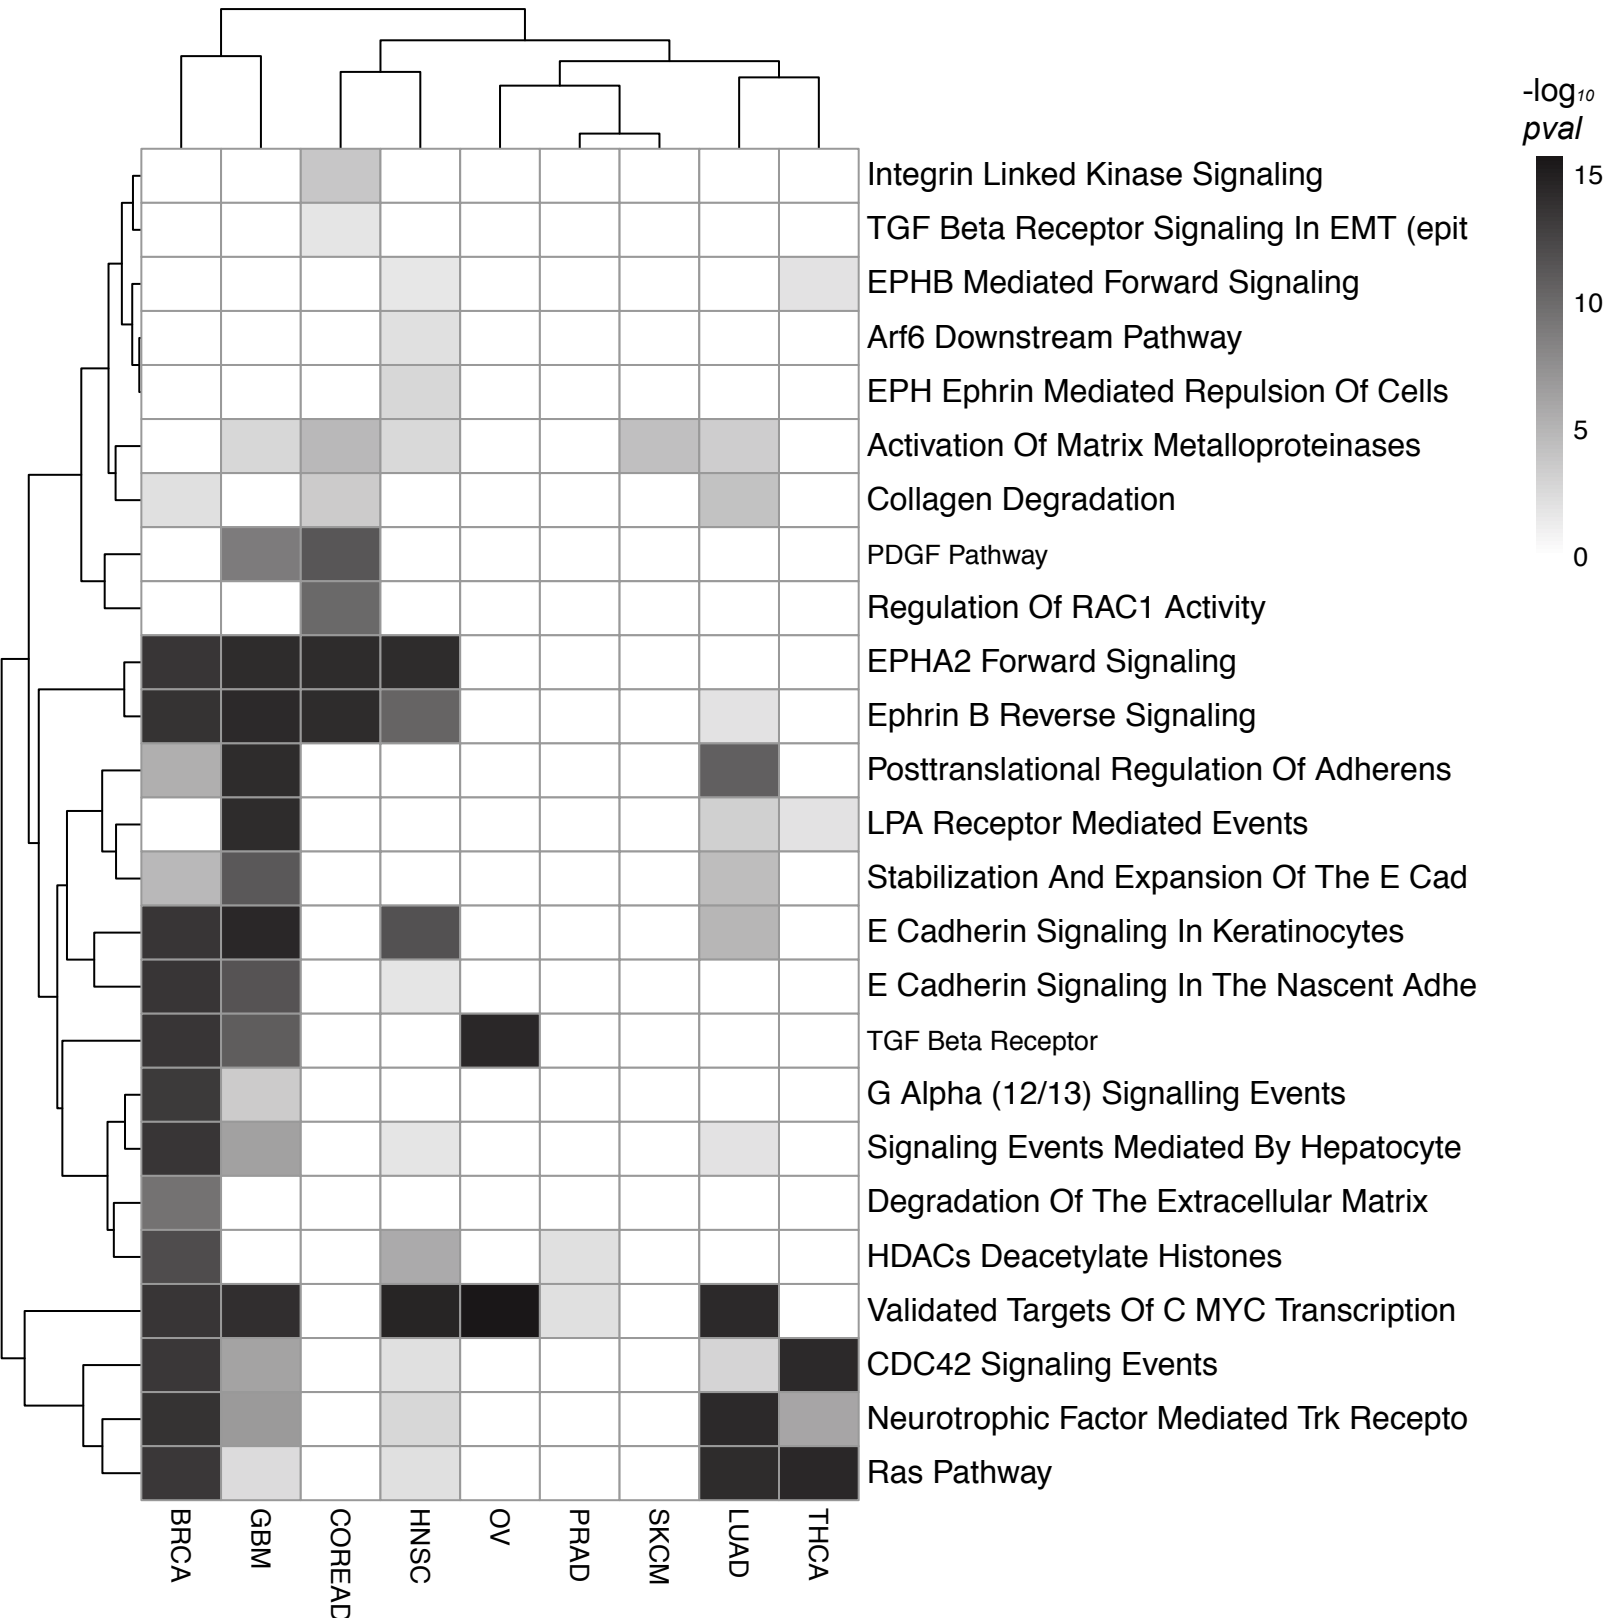

## Enabling Replicative Immortality

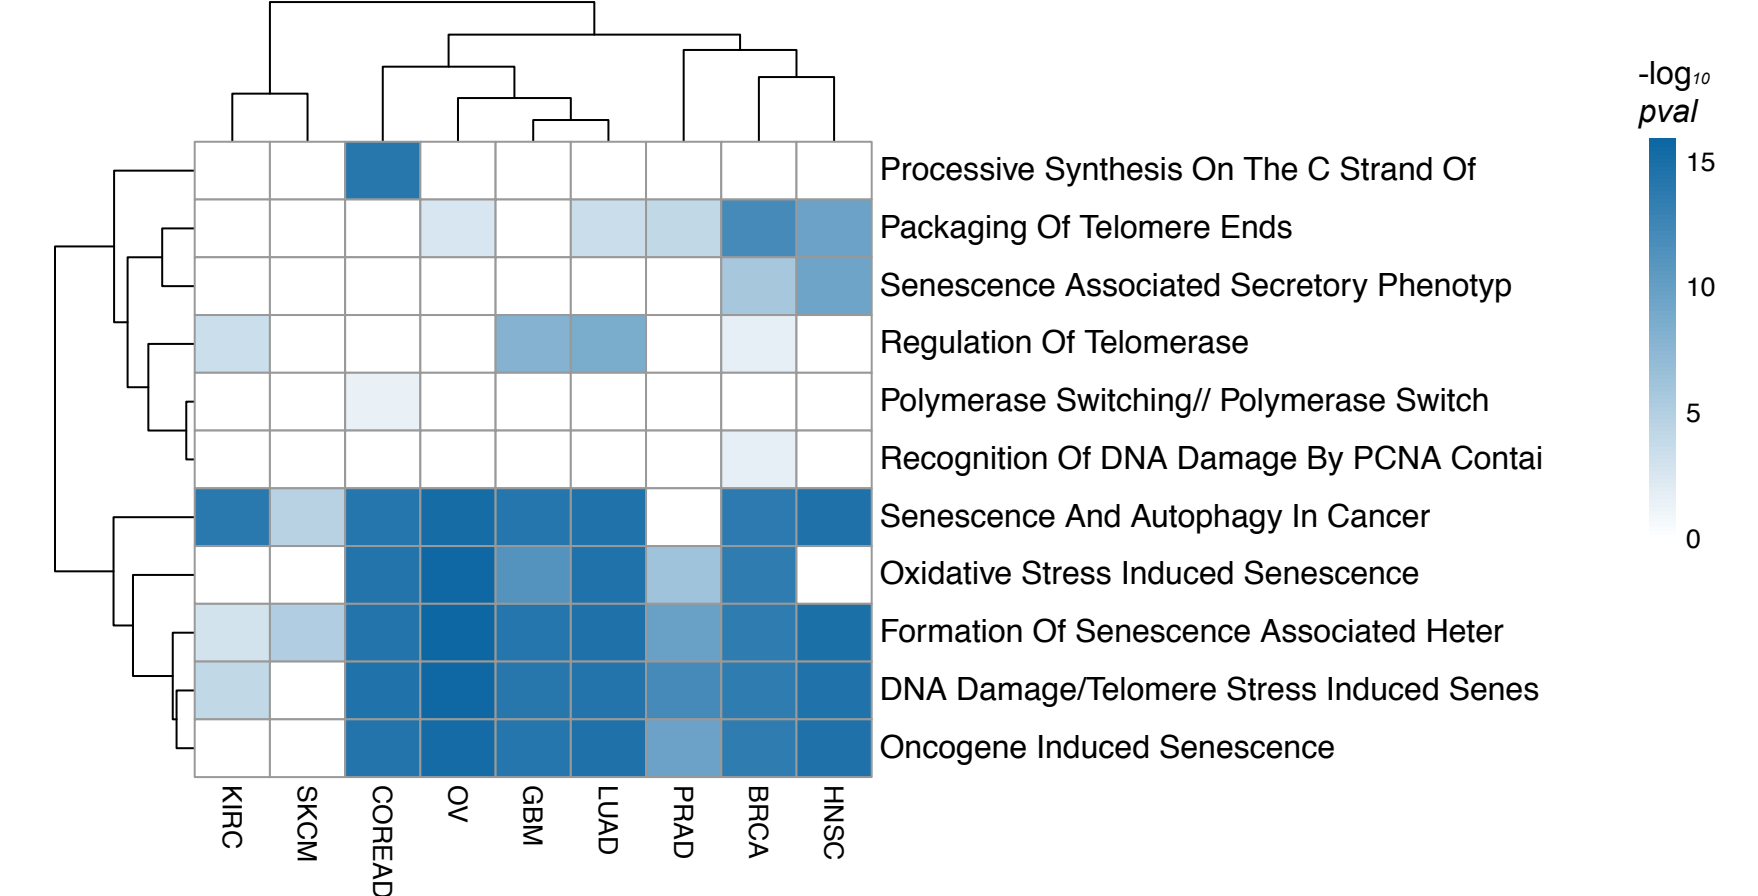

## Avoiding Immune Destruction

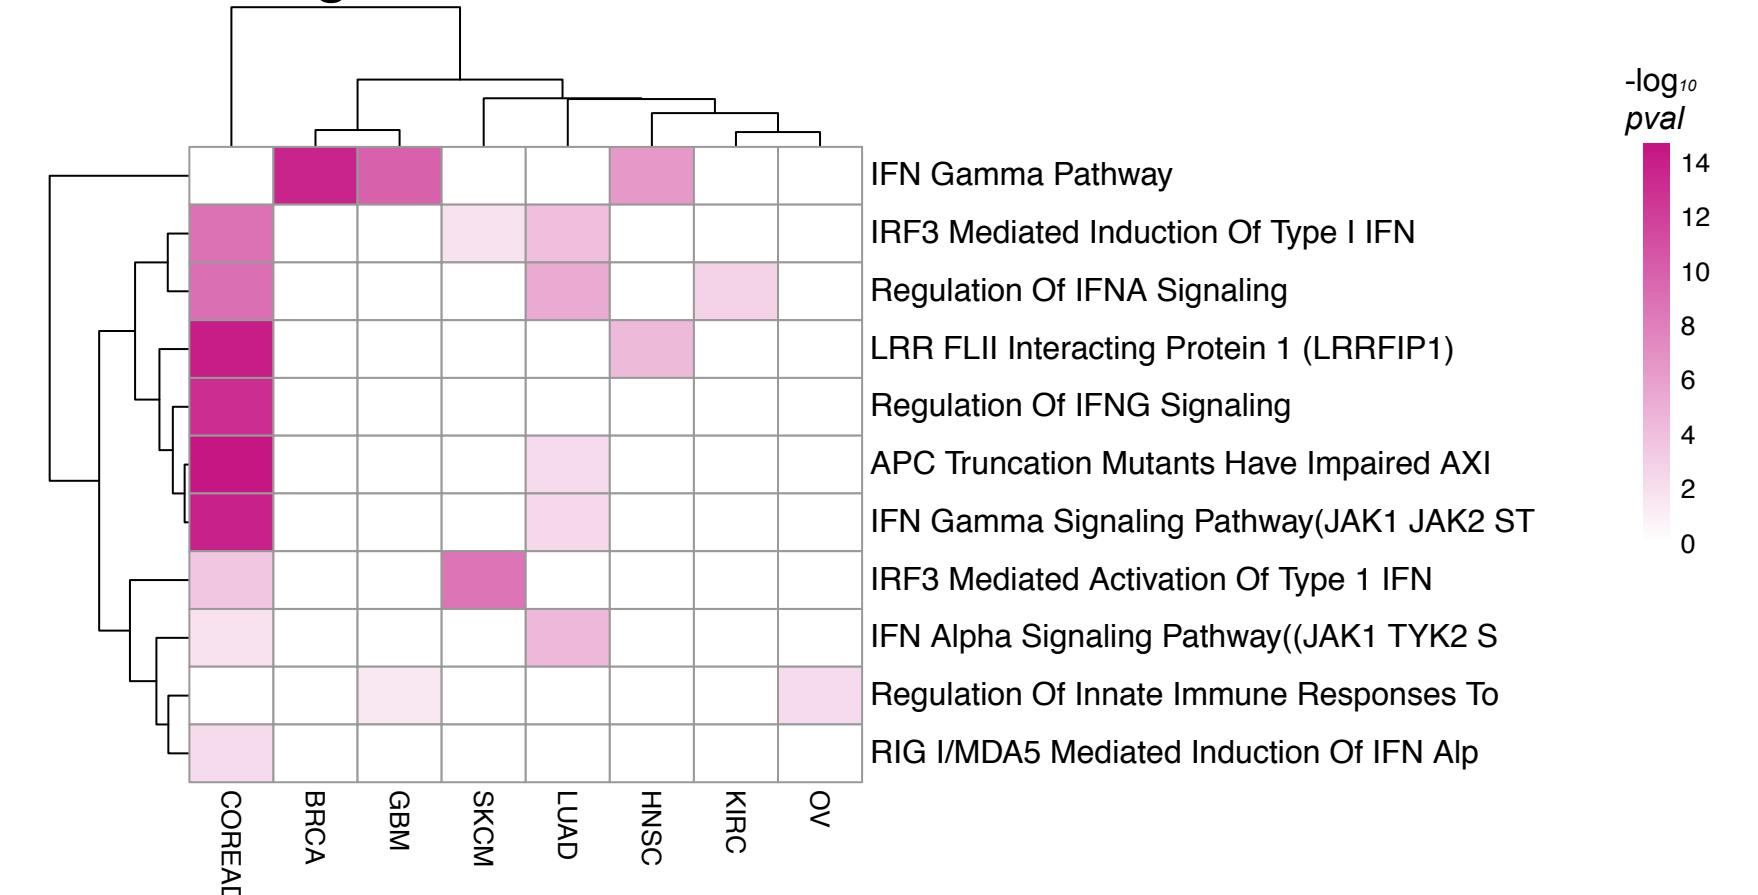

Supplement: Supplementary file [file 077701-4.pdf]
